# Supplementary material for: Discovering active sites in peptide Ala–Val–Thr–Phe that counter 2,2-azobis(2-methylpropanimidamidine)dihydrochloride-induced oxidative stress in HepG2 cells
Source: Royal Society of Chemistry journal article supplement (doi:10.1039/d0ra02292f), 2020-01-01
Supplement: d0ra02292f1.pdf [file d0ra02292f1.pdf]

1 **Supplementary information:**

2 **S-Figure 1** ROS fluorescence intensity in HepG2 cells with different treatments. Data

3 are expressed as mean  $\pm$  SD values. Different letters indicate significant differences

4 ( $P < 0.05$ ).

5

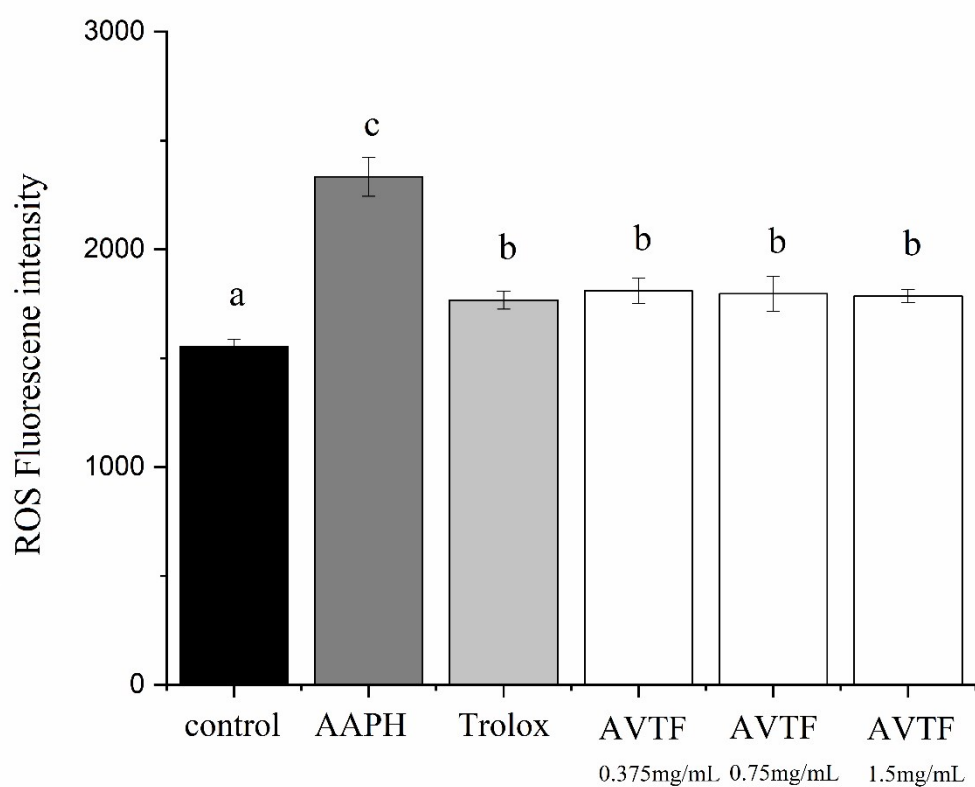

6
